# Supplementary material for: Neural representation of goal direction in the monarch butterfly brain
Source: PubMed Central journal article supplement (PMC10511513; doi:10.1038/s41467-023-41526-w), 2023-09-20
Supplement: 41467_2023_41526_MOESM3_ESM.pdf [file 41467_2023_41526_MOESM3_ESM.pdf]

### Description of Additional Supplementary Files

**Supplementary Movie 1:** Epoch of the butterfly's flight performance before conditioning.

**Supplementary Movie 2:** Epoch of the butterfly's flight performance after conditioning. Note that the butterfly tend to fly almost in the opposite direction to the direction prior to conditioning.
